# Supplementary material for: Discrimination and Social Exclusion in the Outbreak of COVID-19
Source: Int J Environ Res Public Health. 2020 Apr 23;17(8):2933. doi: 10.3390/ijerph17082933 (PMC7215298; doi:10.3390/ijerph17082933)
Supplement: Supplementary file 1 [file ijerph-17-02933-s001.xlsx]

## Sheet: overseas
	descrimination		violent overaction
age	no	yes	no	yes
16-20	79.66	20.34	64.41	35.59
21-30	67.18	32.82	64.43	35.57
30-40	77.78	22.22	71.11	28.89
41-50	78.06	21.94	70.94	29.06
51-60	84.14	15.86	77.53	22.47
>60	83.33	16.67	79.17	20.83
primary school	83.33	16.67	91.67	8.33
middle school	69.12	30.88	58.82	41.18
high school	71.83	28.17	64.79	35.21
collage	75.08	24.92	70.42	29.58
post graduate	76.08	23.92	70.28	29.72
male	76.41	23.59	68.99	31.01
female	74.41	25.59	70.02	29.98
Permanent	70.53	29.47	67.85	32.15
Non-permanent	80.91	19.09	71.83	28.17
low-income	100	0	88.24	11.76
low-middle income	78.38	21.62	73.65	26.35
upper-meddle income	77.69	22.31	71.31	28.69
high-income	74.19	25.81	68.75	31.25

## Sheet: domestic
	report to authority		avoid		expel		with unseemly eyes		greatings to them		Business as usual
age	no	yes	no	yes	no	yes	no	yes	no	yes	no	yes
16-20	9.19	90.81	49.55	50.45	84.43	15.57	97.17	2.83	99.1	0.9	98.1	1.9
21-30	10.02	89.98	46.72	53.28	83.02	16.98	97.55	2.45	99.14	0.86	98.18	1.82
30-40	9.23	90.77	48.95	51.05	83.2	16.8	98.23	1.77	99.39	0.61	98.52	1.48
41-50	8.06	91.94	52.08	47.92	80.83	19.17	98.38	1.62	99.03	0.97	98.89	1.11
51-60	10.54	89.46	53.4	46.6	82.65	17.35	97.85	2.15	99.09	0.91	97.39	2.61
>60	17.19	82.81	52.94	47.06	87.33	12.67	96.38	3.62	99.1	0.9	96.38	3.62
primary school	10.32	89.68	55.16	44.84	71.83	28.17	90.48	9.52	95.63	4.37	96.03	3.97
middle school	5.34	94.66	53.31	46.69	70.73	29.27	94.98	5.02	98.93	1.07	98.5	1.5
high school	7.49	92.51	51.27	48.73	73.27	26.73	97.11	2.89	99.12	0.88	98.29	1.71
collage	8.69	91.31	48.26	51.74	84	16	97.89	2.11	99.25	0.75	98.49	1.51
post graduate	14.26	85.74	48.23	51.77	88.92	11.08	98.63	1.37	99.3	0.7	97.75	2.25
male	9.03	90.97	49.15	50.85	84.44	15.56	98.07	1.93	99.39	0.61	98.6	1.4
female	11.31	88.69	48.54	51.46	81.11	18.89	97.1	2.9	98.79	1.21	97.59	2.41
